# Supplementary material for: A novel thermodynamic approach for the complexation study of toxic metal cations by a landfill leachate
Source: Royal Society of Chemistry journal article supplement (doi:10.1039/c7nj04456a), 2018-01-01
Supplement: c7nj04456a1.pdf [file c7nj04456a1.pdf]

## Supplementary Material

### A novel thermodynamic approach for the complexation study of toxic metal cations by landfill leachate

Salvatore Cataldo<sup>a</sup> Gabriele Lando<sup>b</sup>, Demetrio Milea<sup>b</sup>, Santino Orecchio<sup>c</sup>, Alberto Pettignano<sup>a\*</sup>  
Silvio Sammartano<sup>b</sup>

<sup>a</sup> Dipartimento di Fisica e Chimica, Università di Palermo, Viale delle Scienze, I-90128 Palermo, Italy

<sup>b</sup> Dipartimento di Scienze Chimiche, Biologiche, Farmaceutiche ed Ambientali, Università degli Studi di Messina, Viale Ferdinando Stagno d'Alcontres, 31, I-98166 Messina (Vill. S. Agata), Italy.

<sup>c</sup> Dipartimento di Scienze e Tecnologie Biologiche, Chimiche e Farmaceutiche. Università di Palermo, Viale delle Scienze, I-90128, Palermo, Italy.

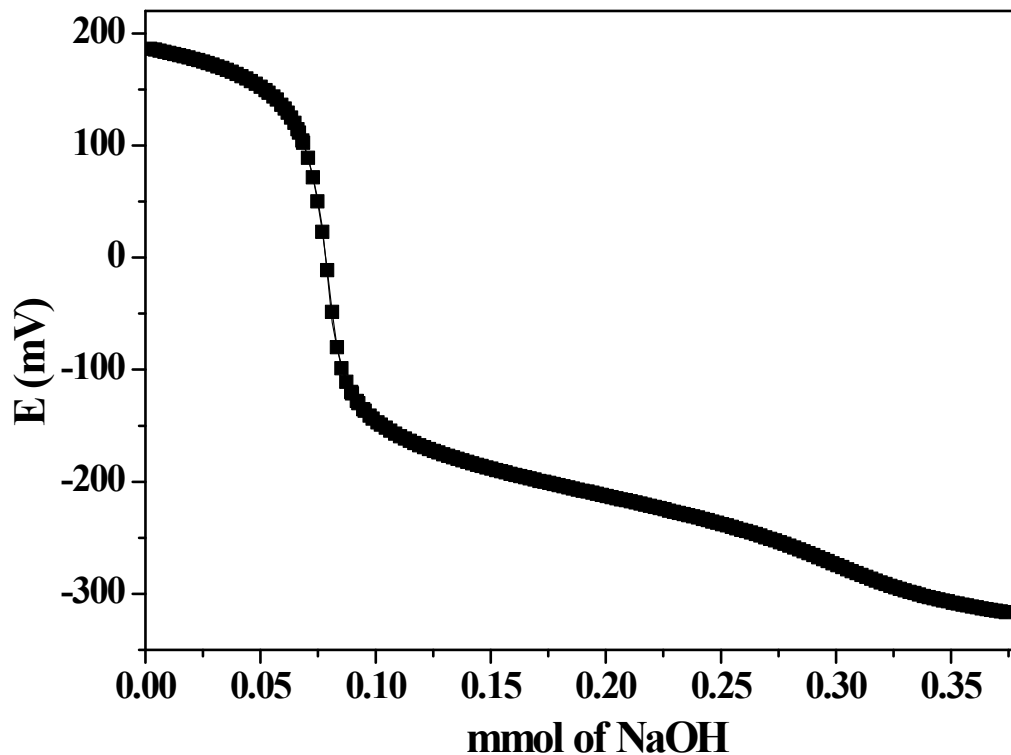

**Figure 1S.** Potentiometric titration curve at  $T = 298.15$  K of 25 mL of solution containing  $1.25 \text{ cm}^3$  of leachate,  $\text{NaCl } 0.1 \text{ mol dm}^{-3}$  and  $\text{HCl } 0.015 \text{ mol dm}^{-3}$  and curve of fit obtained with BSTAC computer program.

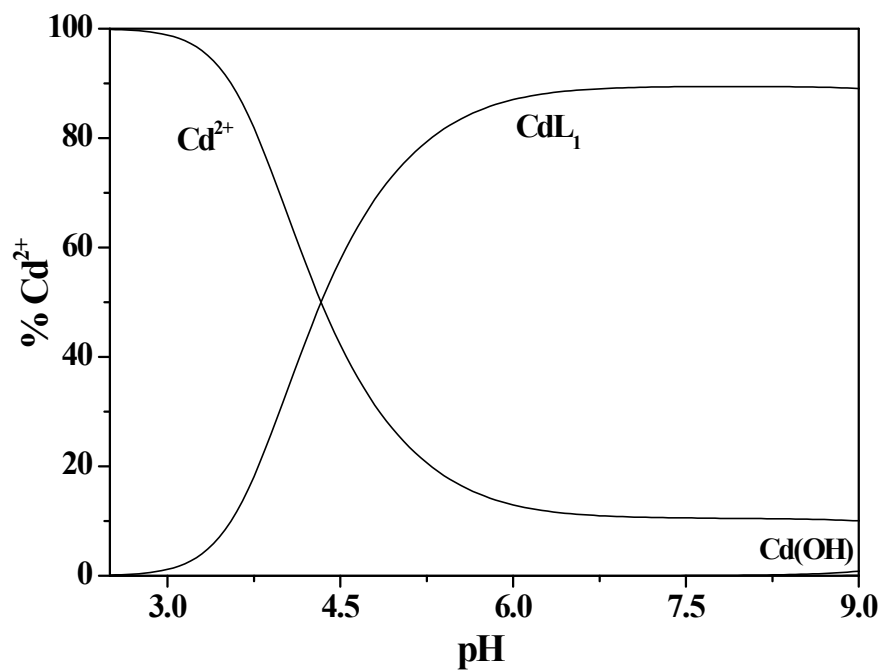

**Figure 2S.** Distribution diagram of Cd<sup>2+</sup> leachate species vs. pH in NaCl, at  $I = 0.1 \text{ mol dm}^{-3}$ .  
Experimental conditions:  $C_{\text{leachate}} = 1 \text{ mmol dm}^{-3}$ ,  $C_{\text{Cd}^{2+}} = 1 \text{ mmol dm}^{-3}$ ,  $T = 298.15 \text{ K}$ .

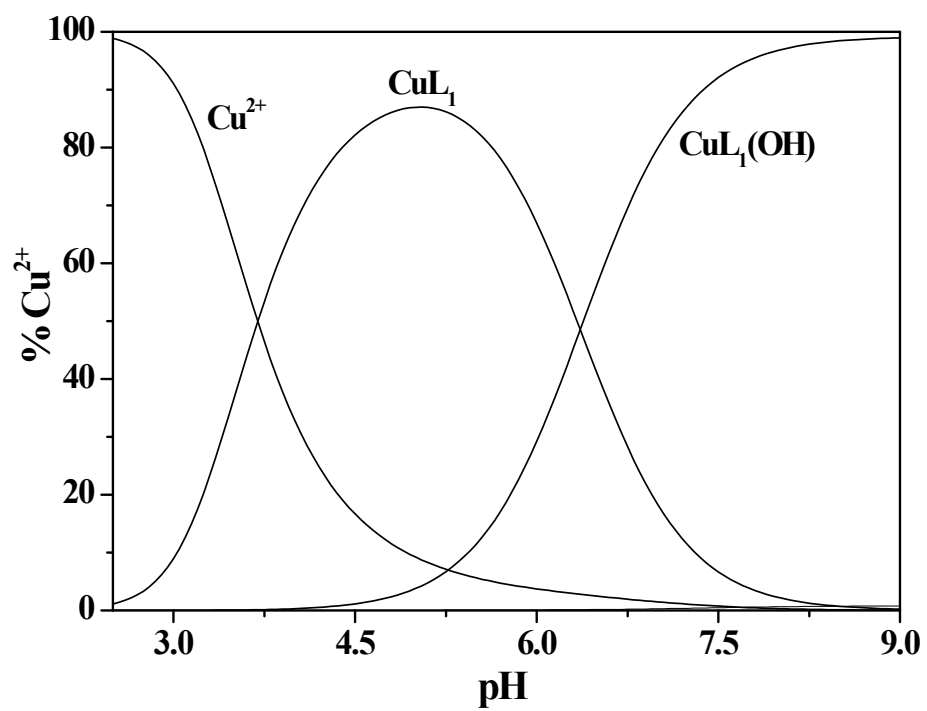

**Figure 3S.** Distribution diagram of Cu<sup>2+</sup> leachate species vs. pH in NaCl, at  $I = 0.1 \text{ mol dm}^{-3}$ .  
Experimental conditions:  $C_{\text{leachate}} = 1 \text{ mmol dm}^{-3}$ ,  $C_{\text{Cu}^{2+}} = 1 \text{ mmol dm}^{-3}$ ,  $T = 298.15 \text{ K}$ .

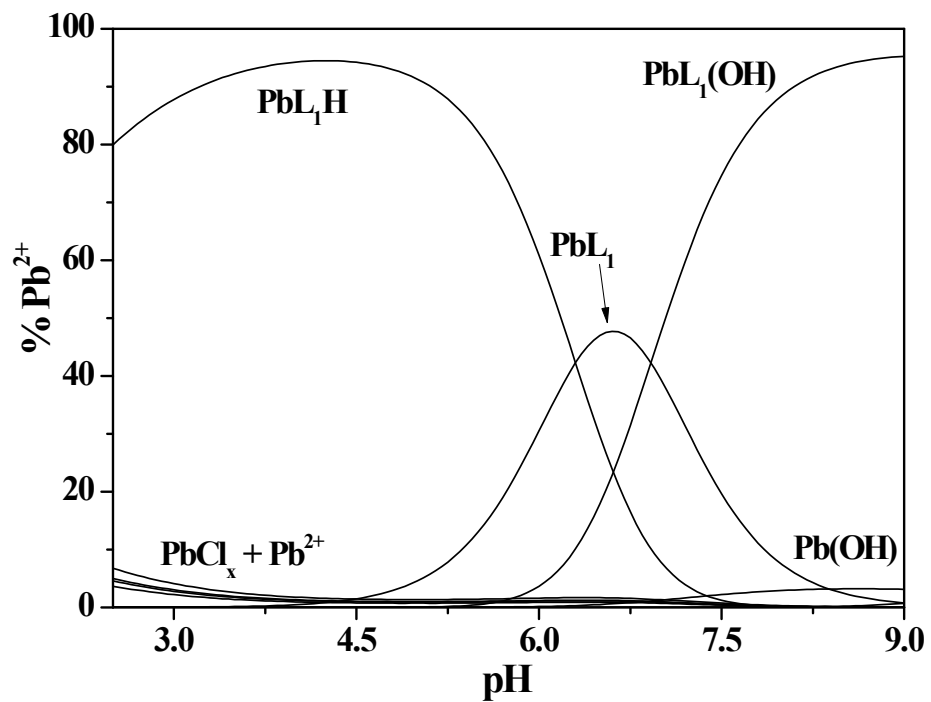

**Figure 4S.** Distribution diagram of Pb<sup>2+</sup> leachate species vs. pH in NaCl, at  $I = 0.1 \text{ mol dm}^{-3}$ .  
 Experimental conditions:  $C_{\text{leachate}} = 1 \text{ mmol dm}^{-3}$ ,  $C_{\text{Pb}^{2+}} = 1 \text{ mmol dm}^{-3}$ ,  $T = 298.15 \text{ K}$ .

**Table 1S.** Chemical characterization of landfill leachate of Bellolampo

| <b>Parameter</b>                   | <b>unit</b>         | <b>value</b>               |
|------------------------------------|---------------------|----------------------------|
| pH                                 |                     | 8.5 ± 0.2                  |
| Conductivity                       | μS cm <sup>-1</sup> | 14300 <sup>a</sup>         |
| Suspended solids                   | g dm <sup>-3</sup>  | 1.11 <sup>a</sup>          |
| COD                                | mg dm <sup>-3</sup> | 9330 <sup>b</sup>          |
| NH <sub>4</sub> <sup>+</sup>       | mg dm <sup>-3</sup> | 1790 (99) <sup>b, c</sup>  |
| Total N                            | mg dm <sup>-3</sup> | 1650 (118) <sup>b, c</sup> |
| Cl <sup>-</sup>                    | mg dm <sup>-3</sup> | 1760 <sup>b</sup>          |
| Residue ( <i>T</i> = 453.15 K)     | g dm <sup>-3</sup>  | 12.24 ± 0.05               |
| Ash content ( <i>T</i> = 823.15 K) | g dm <sup>-3</sup>  | 9.67 ± 0.04                |
| Al                                 | mg dm <sup>-3</sup> | 2.424 <sup>d</sup>         |
| Cr                                 | mg dm <sup>-3</sup> | 0.503 <sup>d</sup>         |
| Mn                                 | mg dm <sup>-3</sup> | 0.056 <sup>d</sup>         |
| Fe                                 | mg dm <sup>-3</sup> | 1.887 <sup>d</sup>         |
| Co                                 | mg dm <sup>-3</sup> | 0.059 <sup>d</sup>         |
| Ni                                 | mg dm <sup>-3</sup> | 0.119 <sup>d</sup>         |
| Cu                                 | mg dm <sup>-3</sup> | 0.009 <sup>d</sup>         |
| Zn                                 | mg dm <sup>-3</sup> | 0.083 <sup>d</sup>         |
| Cd                                 | mg dm <sup>-3</sup> | < 0.001 <sup>d</sup>       |
| Sn                                 | mg dm <sup>-3</sup> | 0.240 <sup>d</sup>         |
| Pb                                 | mg dm <sup>-3</sup> | 0.008 <sup>d</sup>         |

<sup>a</sup>± 2 %, <sup>b</sup>± 5 %, <sup>c</sup> in parenthesis the mmol L<sup>-1</sup> of NH<sub>4</sub><sup>+</sup> and of total N; <sup>d</sup>± 10 %
